# Supplementary material
Source: publisher site journal article supplement (https://www.dovepress.com/get_supplementary_file.php?f=187567.xlsx)
Supplement: Supplementary file 1 [file get_supplementary_file.php]

## Sheet: Sheet1
	TABLE S3. Change in physiological and symptomatic responses recorded at baseline and at the end of the exercise program.
		All (N=116)				BODE 0–2 (N=42; 36%)				BODE 3–4 (N=50; 43%)				BODE 5–7 (N=24; 21%)
		Baseline	End	∆ (95%CI)		Baseline	End	∆ (95%CI)		Baseline	End	∆ (95%CI)		Baseline	End	∆ (95%CI)
	Number of PR sessions:			43.2 (38.0–48.4)				50.2 (40.1–60.3)				41.7 (34.1–49.3)				34.9 (25.9–44.0)
	Subjects (N):	116	110	110		42	38	38		50	49	49		24	23	23
	3-min CRT
	Repetitions (n)	46.1 ± 13.1	54.8 ± 16.1	8.8 (7.1, 10.5)		51.9 ± 13.0	61.7 ± 15.4	9.8 (6.5, 13.0)		45.0 ± 12.0	54.2 ± 15.5	9.4 (6.8, 12.1)		38.5 ± 11.0	44.7 ± 13.2	5.8 (3.3, 8.3)
	SpO2 (%)	90.5 ± 4.5	90.3 ± 4.4	-0.0 (-0.6, 0.5)		93.0 ± 3.2	92.8 ± 3.7	-0.0 (-0.7, 0.7)		89.1 ± 4.8	89.1 ± 4.3	-0.0 (-1.1, 1.0)		88.8 ± 3.9	88.4 ± 4.0	-0.1 (-1.3, 1.0)
	HR (bpm)	113.1 ± 16.4	116.4 ± 15.8	3.5 (1.1, 5.9)		115.1 ± 16.5	119.1 ± 15.4	4.9 (1.4, 8.5)		115.1 ± 16.8	117.3 ± 15.9	2.2 (-1.7, 6.2)		105.3 ± 13.6	110.0 ± 15.2	4.0 (-1.6, 9.5)
	Borg D [median (Q1, Q3)]	5.0 (4.0, 7.0)	5.0 (4.0, 7.0)	-0.1 (-0.5, 0.3)		4.8 (3.0, 7.0)	4.0 (3.0, 6.0)	-0.0 (-0.7, 0.6)		5.0 (4.5, 8.0)	6.0 (5.0, 7.5)	0.0 (-0.6, 0.6)		6.0 (5.0, 7.5)	6.0 (4.0, 7.0)	-0.5 (-1.3, 0.3)
	Borg F [median (Q1, Q3)]	5.0 (3.0, 7.0)	5.0 (3.0, 6.0)	-0.4 (-0.9, -0.0)		5.0 (3.0, 7.0)	3.0 (3.0, 5.0)	-0.4 (-1.1, 0.3)		5.0 (4.0, 7.0)	5.0 (3.0, 7.0)	-0.4 (-1.1, 0.2)		5.0 (3.0, 6.0)	5.0 (3.0, 5.0)	-0.5 (-1.5, 0.5)
	1-min STST
	Repetitions (n)	23.3 ± 8.5	28.5 ± 9.3	5.2 (4.2, 6.2)		26.8 ± 9.3	32.8 ± 10.5	5.9 (4.1, 7.8)		22.2 ± 7.5	27.9 ± 7.8	5.9 (4.3, 7.4)		19.7 ± 6.7	22.5 ± 6.4	2.6 (0.5, 4.6)
	SpO2 (%)	92.0 ± 3.5	91.9 ± 3.5	-0.1 (-0.6, 0.4)		93.0 ± 2.9	93.1 ± 2.9	0.3 (-0.4, 1.0)		91.1 ± 3.7	91.1 ± 3.8	-0.0 (-0.9, 0.9)		92.0 ± 3.6	91.4 ± 3.4	-0.9 (-2.3, 0.4)
	HR (bpm)	107.9 ± 16.1	110.4 ± 16.7	2.4 (-0.2, 4.9)		111.1 ± 16.4	112.8 ± 16.8	2.3 (-2.1, 6.8)		107.3 ± 15.8	111.3 ± 16.9	4.1 (0.3, 7.8)		103.5 ± 15.9	104.0 ± 15.3	-1.2 (-7.4, 5.0)
	Borg D [median (Q1, Q3)]		3.0 (2.5, 5.0)	-0.4 (-0.8, 0.0)		4.0 (3.0, 5.0)	3.0 (2.0, 4.0)	-0.3 (-1.0, 0.4)		4.0 (3.0, 5.0)	4.0 (2.0, 6.0)	-0.1 (-0.7, 0.5)		5.0 (3.5, 6.0)	3.5 (3.0, 5.0)	-1.3 (-2.2, -0.4)
	Borg F [median (Q1, Q3)]	4.0 (3.0, 5.0)	3.0 (2.0, 4.0)	-0.6 (-1.1, -0.2)		4.0 (3.0, 5.0)	3.0 (2.0, 4.0)	-0.7 (-1.4, -0.1)		4.0 (3.0, 5.0)	4.0 (2.0, 5.0)	-0.4 (-1.1, 0.4)		4.0 (3.0, 5.0)	3.0 (2.0, 4.0)	-1.1 (-2.5, 0.2)
	5STST
	Time (sec)	9.4 ± 3.3	8.0 ± 2.5	-1.4 (-1.9, -0.9)		9.0 ± 2.6	7.3 ± 1.9	-1.6 (-2.1, -1.2)		9.3 ± 2.6	8.1 ± 2.4	-1.3 (-1.9, -0.7)		10.5 ± 5.1	9.1 ± 3.3	-1.3 (-3.0, 0.5)
	SpO2 (%)	94.1 ± 2.6	94.5 ± 2.3	0.4 (0.0, 0.9)		94.7 ± 2.0	95.0 ± 2.1	0.4 (-0.1, 1.0)		93.7 ± 2.9	94.4 ± 2.3	0.7 (-0.0, 1.4)		94.1 ± 2.8	94.0 ± 2.4	-0.0 (-1.1, 1.0)
	HR (bpm)	94.5 ± 13.3	94.1 ± 12.9	-0.3 (-2.2, 1.6)		94.9 ± 12.5	92.4 ± 12.4	-2.3 (-5.4, 0.9)		94.6 ± 14.2	94.2 ± 14.0	0.2 (-2.9, 3.2)		93.6 ± 13.5	96.7 ± 11.5	2.0 (-2.0, 6.0)
	Borg D [median (Q1, Q3)]	2.0 (1.0, 3.0)	1.0 (0.5, 2.0)	-0.7 (-1.1, -0.4)		2.0 (1.0, 3.0)	1.0 (0.0, 2.0)	-1.1 (-1.6, -0.6)		2.0 (1.0, 3.0)	1.5 (0.5, 3.0)	-0.6 (-1.0, -0.1)		3.0 (1.0, 4.0)	2.5 (1.5, 4.0)	-0.6 (-1.5, 0.3)
	Borg F [median (Q1, Q3)]	2.0 (1.0, 3.0)	2.0 (1.0, 3.0)	-0.5 (-0.9, -0.1)		2.0 (1.0, 3.0)	1.0 (0.0, 2.0)	-0.9 (-1.7, -0.1)		2.0 (1.0, 3.0)	2.0 (1.0, 3.0)	-0.2 (-0.6, 0.3)		3.0 (1.0, 4.5)	2.0 (1.0, 4.0)	-0.7 (-1.9, 0.5)
	6MWT
	Distance (m)	470.8 ± 101.5	512.8 ± 93.9	46.2 (34.2, 58.2)		529.7 ± 76.5	569.3 ± 76.6	39.7 (20.7, 58.6)		463.4 ± 90.2	507.9 ± 77.0	48.4 (32.5, 64.3)		383.0 ± 95.9	429.4 ± 88.9	52.4 (15.1, 89.6)
	SpO2 (%)	88.8 ± 5.6	87.9 ± 5.3	-0.8 (-1.6, -0.0)		91.4 ± 4.5	90.2 ± 4.6	-1.2 (-2.2, -0.3)		87.1 ± 5.8	86.9 ± 5.9	-0.4 (-1.6, 0.9)		87.8 ± 5.5	86.6 ± 4.2	-0.9 (-3.1, 1.3)
	HR (bpm)	114.8 ± 17.2	116.2 ± 17.3	2.0 (-0.6, 4.6)		115.7 ± 16.9	118.2 ± 15.0	3.5 (-0.9, 7.8)		115.7 ± 18.6	116.8 ± 19.8	1.6 (-2.9, 6.1)		111.2 ± 14.4	111.8 ± 14.9	0.3 (-4.2, 4.7)
	Borg D [median (Q1, Q3)]	5.0 (4.0, 7.0)	5.0 (4.0, 7.0)	-0.0 (-0.5, 0.4)		4.0 (3.0, 6.0)	4.0 (3.0, 5.0)	-0.1 (-0.9, 0.7)		5.0 (4.0, 7.0)	5.5 (4.0, 7.0)	0.1 (-0.7, 0.9)		5.5 (5.0, 7.0)	5.0 (5.0, 7.0)	-0.2 (-1.1, 0.7)
	Borg F [median (Q1, Q3)]	4.0 (3.0, 5.0)	4.5 (3.0, 5.5)	-0.1 (-0.6, 0.5)		4.0 (3.0, 5.0)	4.0 (3.0, 5.0)	0.4 (-0.5, 1.2)		5.0 (3.0, 5.0)	5.0 (3.0, 7.0)	-0.1 (-1.0, 0.7)		4.5 (3.5, 6.5)	4.0 (2.0, 5.0)	-1.3 (-3.6, 1.1)
	Endurance cycle test
	Duration (min)	10.8 ± 6.3	15.0 ± 9.8	4.1 (2.4, 5.9)		10.9 ± 6.1	15.8 ± 13.9	4.5 (0.2, 8.8)		10.5 ± 6.5	14.6 ± 6.3	4.1 (2.6, 5.7)		11.0 ± 6.4	14.4 ± 6.3	3.3 (0.8, 5.9)
	SpO2 (%)	91.7 ± 3.9	91.5 ± 3.6	-0.4 (-0.9, 0.2)		93.9 ± 2.5	93.1 ± 2.6	-0.6 (-1.2, 0.1)		90.2 ± 4.1	90.6 ± 4.2	0.2 (-0.7, 1.1)		91.0 ± 4.1	90.5 ± 3.0	-1.4 (-3.1, 0.3)
	HR (bpm)	116.7 ± 24.5	120.7 ± 17.4	3.7 (-0.3, 7.6)		122.0 ± 26.9	126.4 ± 17.9	4.3 (-2.9, 11.5)		114.3 ± 25.1	119.2 ± 16.7	5.0 (-1.3, 11.2)		112.2 ± 17.1	113.3 ± 15.2	-0.6 (-6.9, 5.6)
	Borg D [median (Q1, Q3)]	6.0 (5.0, 8.0)	5.0 (4.0, 7.0)	-0.7 (-1.2, -0.3)		5.0 (4.0, 7.0)	5.0 (4.0, 7.0)	-0.3 (-1.1, 0.5)		6.0 (5.0, 8.0)	5.0 (4.0, 7.0)	-0.9 (-1.6, -0.3)		7.0 (6.0, 9.0)	6.0 (4.5, 7.0)	-1.1 (-2.0, -0.2)
	Borg F [median (Q1, Q3)]	6.0 (5.0, 7.0)	5.0 (4.0, 7.0)	-1.0 (-1.5, -0.6)		6.0 (5.0, 7.0)	5.0 (4.0, 6.0)	-1.0 (-1.8, -0.2)		6.0 (5.0, 7.0)	5.0 (4.0, 7.0)	-1.0 (-1.7, -0.3)		6.0 (5.0, 7.0)	5.0 (3.0, 6.5)	-1.1 (-2.0, -0.1)
	QUESTIONNARIES
	mMRC	2.1 ± 0.8	1.9 ± 0.9	-0.1 (-0.2, -0.0)		1.5 ± 0.7	1.4 ± 0.7	-0.1 (-0.3, 0.0)		2.2 ± 0.7	2.1 ± 0.8	-0.1 (-0.2, 0.1)		2.8 ± 0.7	2.6 ± 0.6	-0.2 (-0.3, -0.0)
	DIRECT	14.3 ± 6.3	12.5 ± 6.7	-1.9 (-2.6, -1.2)		12.1 ± 5.4	9.7 ± 4.9	-2.4 (-3.6, -1.2)		14.5 ± 6.1	13.3 ± 7.0	-1.4 (-2.6, -0.2)		18.0 ± 6.7	15.9 ± 7.1	-2.0 (-3.6, -0.4)
	CAT	18.9 ± 7.0	16.6 ± 7.1	-2.6 (-3.5, -1.6)		18.0 ± 6.8	14.3 ± 5.4	-3.7 (-5.4, -1.9)		18.3 ± 7.1	16.3 ± 7.2	-2.7 (-4.0, -1.3)		21.8 ± 6.9	21.3 ± 7.3	-0.4 (-2.3, 1.5)
	SGRQ
	Symptoms	53.7 ± 19.2	51.4 ± 20.9	-2.1 (-4.7, 0.6)		54.0 ± 19.5	50.8 ± 20.9	-2.6 (-6.5, 1.3)		51.7 ± 17.1	50.2 ± 18.3	-2.5 (-6.8, 1.7)		56.9 ± 22.7	55.2 ± 26.2	0.0 (-6.9, 6.9)
	Activity	69.2 ± 17.8	65.8 ± 16.8	-4.0 (-6.3, -1.7)		63.7 ± 18.4	58.1 ± 17.4	-6.7 (-10.6, -2.8)		70.6 ± 17.5	69.2 ± 14.6	-2.4 (-6.2, 1.4)		75.7 ± 15.5	72.4 ± 15.6	-2.5 (-7.4, 2.4)
	Impact	36.1 ± 18.4	30.6 ± 18.6	-5.2 (-7.8, -2.7)		33.7 ± 17.9	24.9 ± 16.5	-8.7 (-14.0, -3.4)		34.3 ± 16.3	30.1 ± 15.5	-4.7 (-8.0, -1.5)		43.6 ± 21.8	42.4 ± 23.2	-0.1 (-4.8, 4.6)
	Total	50.2 ± 16.3	45.2 ± 15.5	-4.9 (-6.9, -3.0)		47.3 ± 17.2	39.5 ± 14.7	-7.7 (-11.5, -4.0)		49.6 ± 14.0	45.8 ± 13.0	-4.5 (-6.9, -2.0)		56.2 ± 18.2	54.0 ± 18.1	-1.0 (-5.2, 3.2)
	HADS Anxiety	7.0 ± 4.1	5.9 ± 3.8	-1.1 (-1.7, -0.5)		6.4 ± 4.0	5.5 ± 3.7	-0.7 (-1.6, 0.3)		6.8 ± 3.9	5.8 ± 3.8	-1.2 (-2.1, -0.3)		8.4 ± 4.4	6.7 ± 4.1	-1.6 (-3.4, 0.2)
	HADS Depression	6.9 ± 3.5	5.9 ± 3.6	-1.0 (-1.5, -0.4)		6.7 ± 3.4	5.7 ± 3.6	-1.0 (-1.8, -0.1)		6.6 ± 2.9	5.6 ± 3.0	-1.0 (-1.8, -0.3)		8.1 ± 4.4	7.0 ± 4.6	-0.9 (-2.5, 0.7)
	Δ: Change from baseline to end of PR; PR: physical rehabilitation; 3-min CRT: 3-minute chair rise test; SpO2: Pulse oxygen saturation; HR: heart rate; bpm: beats per minute; Borg D: Borg Dyspnea; Borg F: Borg Fatigue; 1-min STST: 1-minute sit-to-stand test; 5STST: 5-repetition sit-to-stand-test; sec: second; 6MWT: 6-minute walk test; m: meter; min:minute; N/n: number; mMRC: modified Medical Resea…
